# Supplementary material for: Lung-resident memory B cells protect against bacterial pneumonia
Source: JCI journal article supplement (doi:10.1172/jci141810), 2021-06-01
Supplement: sd1 [file 1]

### Supplementary Figures

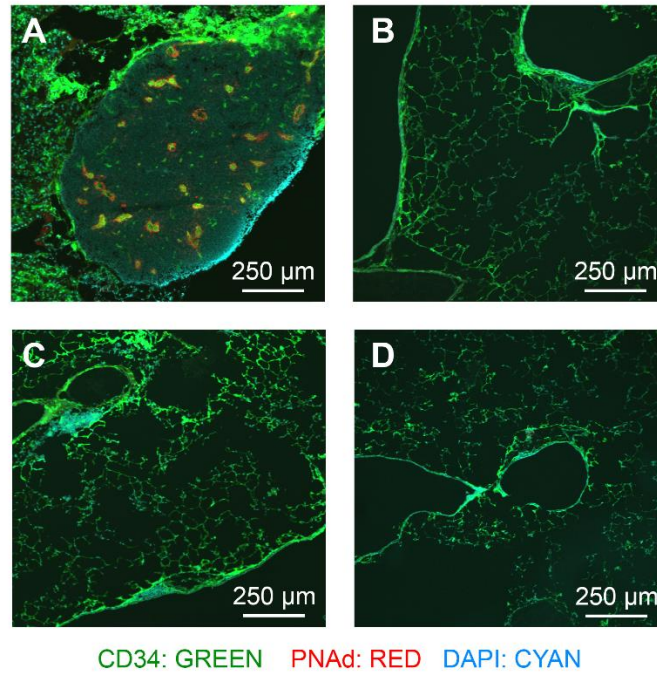

**Figure S1. Experienced mouse lungs do not contain HEVs.** Frozen sections of an experienced mouse mediastinal lymph node positive control (**A**) or of lungs from three experienced mice (**B-D**) were stained for nuclei (DAPI, blue), the blood vessel marker CD34 (green), and peripheral node addressin (PNAf, red) and visualized via confocal microscopy.

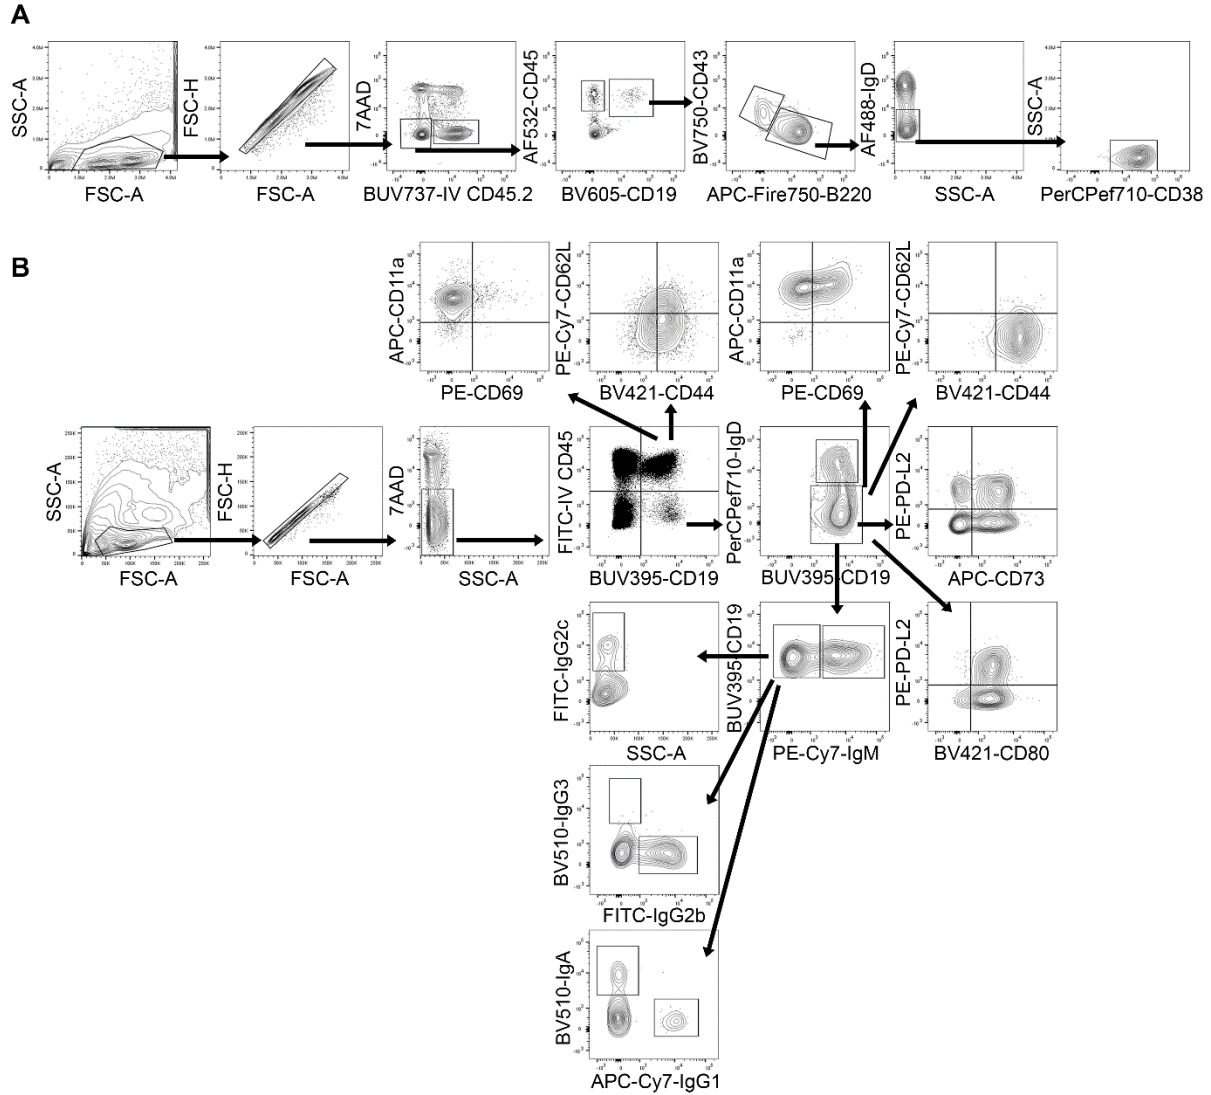

**Figure S2. Flow cytometry gating schemes used to analyze mouse lung B cells. (A)** Gating used in a subset of mice from Figure 2 I-J and all mice in Figure 2K, collected on the Cytex Aurora spectral cytometer. **(B)** Gating used for all other flow cytometry data, collected on the BD LSR II.

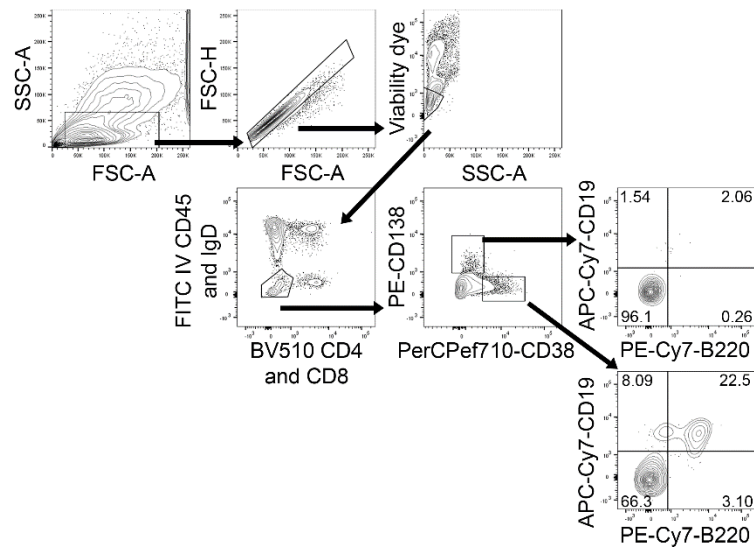

**Figure S3. Flow cytometry gating schemes used to analyze mouse lung plasma cells.** Gating used in all mice from Figure 3 E-G, collected on the BD LSR II.

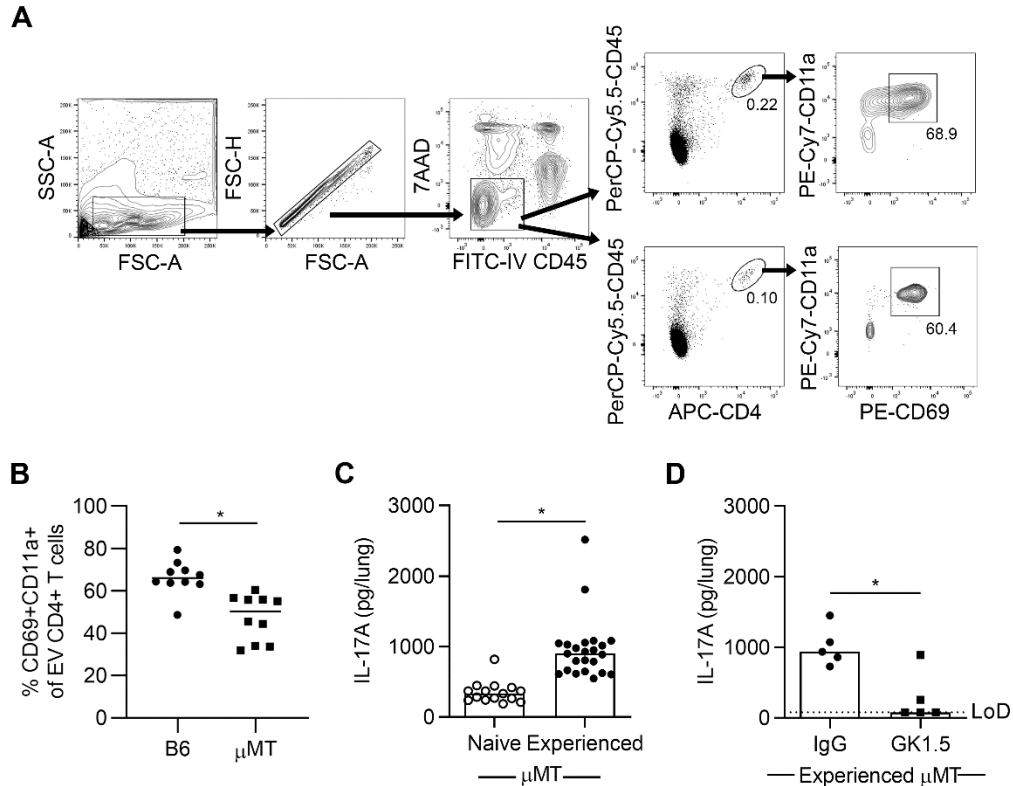

**Figure S4. Experienced  $\mu$ MT mice possess lung TRM cells comparable to those of B6 mice.**

(A) Flow cytometry gating scheme used to assess lungs of experienced B6 and  $\mu$ MT mice for EV T cells bearing a resident memory phenotype (CD69+CD11a<sup>hi</sup>). (C) Results obtained from gating in (A), showing the percent of EV lung CD4+ T cells that were CD69+CD11a<sup>hi</sup> in lungs of experienced B6 and  $\mu$ MT mice (Mann-Whitney test, \*P=0.0002). (C) IL-17A levels determined by ELISA in whole lung homogenates of naïve and experienced  $\mu$ MT mice after 24 h of Sp3 pneumonia (Mann-Whitney test, \*P<0.0001). (D) IL-17A levels determined by ELISA in whole-lung homogenates of experienced  $\mu$ MT mice treated with either an IgG isotype control or a CD4+ T cell depleting antibody (GK1.5) prior to 24 h of Sp3 challenge (Mann-Whitney test, \*P=0.032).

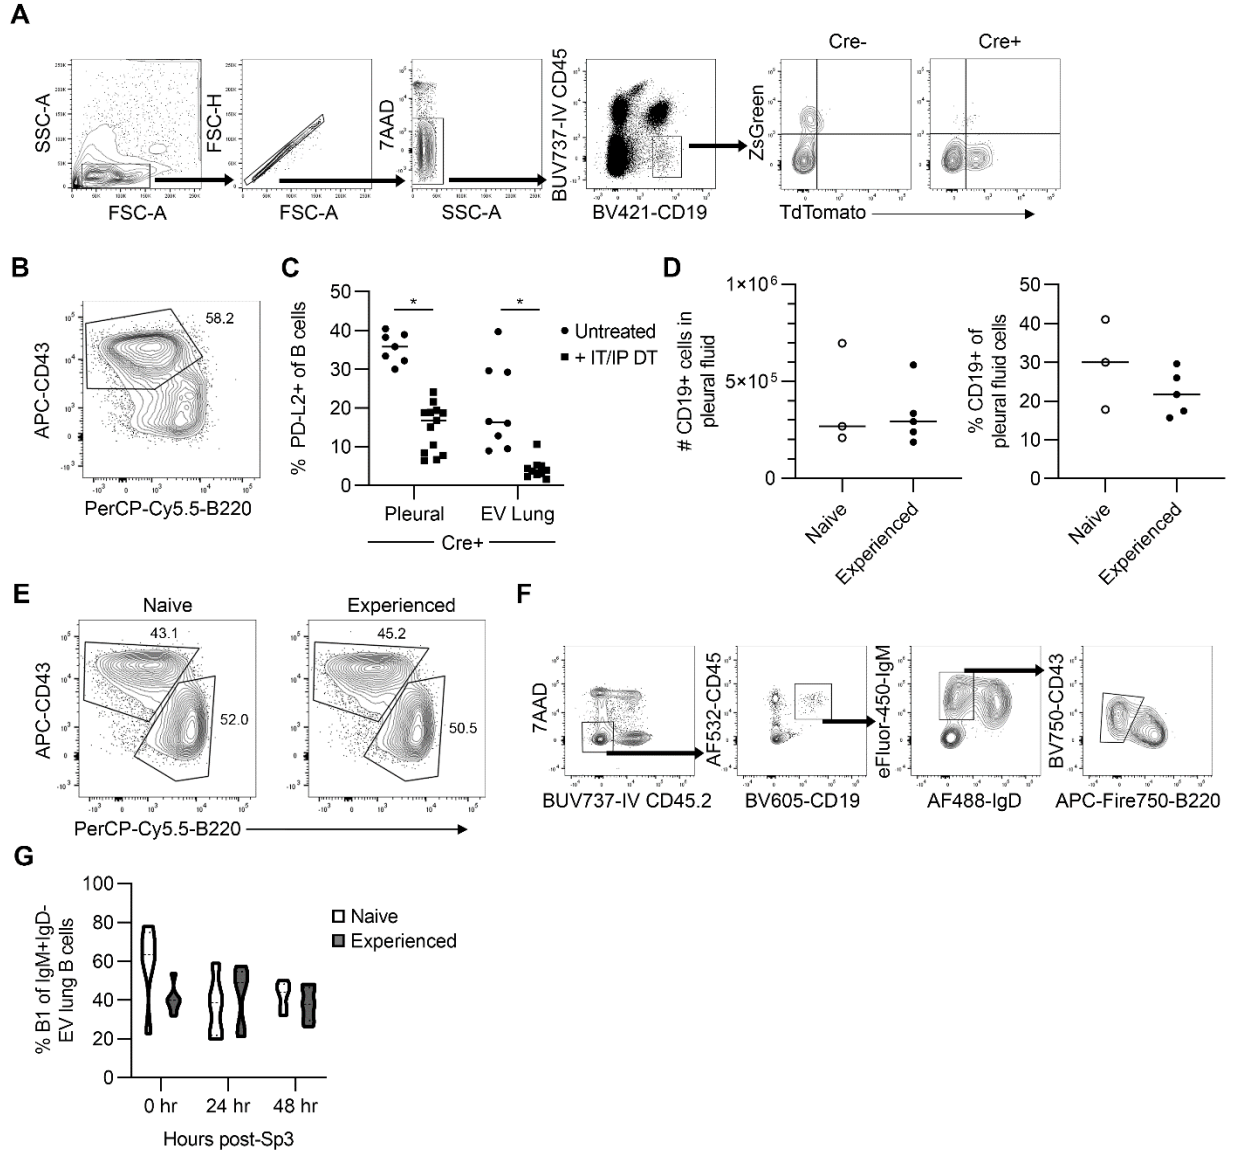

**Figure S5. Although they are depleted by DT in PZTD mice, pleural fluid and B1 B cells are unlikely to contribute to lung protection after prior pneumococcal experience.** (A) Flow cytometry gating scheme used in PZTD mouse lungs. (B) Representative flow plot gated on pleural fluid CD19+TdTomato+ cells from a Cre+ PZTD mouse, showing that the majority of PD-L2+ B cells in the pleural fluid have a B1 B cell phenotype (CD43<sup>hi</sup>B220<sup>lo</sup>). (C) The percent of pleural fluid and total EV lung B cells that are PD-L2+ in Cre+ PZTD mice with or without DT treatment (2-way ANOVA, \*P<0.0001). (D) The number (left) and percent (right) of CD19+ cells in the pleural fluid of naïve and experienced C57BL6/J mice as determined by flow cytometry. (E) Representative flow cytometry plots showing the similar distributions of B1 and B2 cells in the pleural fluid of naïve and experienced C57BL6/J mice. (F) Gating scheme used to assess lung B1 B cells in (G). Initial gates for lymphocytes and single cells done as in previous experiments. (G) The percent of EV lung IgM+ B cells with a B1 phenotype at baseline and after one to two days of Sp3 pneumonia in naïve and experienced C57BL6/J mice. N=6 mice per group (no significant differences by 2-way ANOVA).

## Supplementary Methods

| <b>Antibody (target-fluorophore)</b> | <b>Clone</b> | <b>Supplier</b>  | <b>Product Number</b> |
|--------------------------------------|--------------|------------------|-----------------------|
| <i>Mouse flow cytometry</i>          |              |                  |                       |
| Blimp1-APC                           | 150007       | Biolegend        | 150007                |
| B220-APC Fire 750                    | RA3-6B2      | Biolegend        | 103259                |
| B220- PerCp Cy5.5                    | RA3-6B2      | Biolegend        | 103235                |
| B220-PECy7                           | RA3-6B2      | Biolegend        | 103221                |
| CD4-APC                              | GK1.5        | Biolegend        | 100411                |
| CD4-BV510                            | GK1.5        | Biolegend        | 100449                |
| CD8-BV510                            | 53-6.7       | Biolegend        | 100751                |
| CD11a-APC                            | M17/4        | Biolegend        | 101119                |
| CD11a-PECy7                          | M17/4        | Biolegend        | 101121                |
| CD19-BUV395                          | 1D3          | BD Biosciences   | 563557                |
| CD19-BV605                           | 6D5          | Biolegend        | 115539                |
| CD19-BV421                           | 6D5          | Biolegend        | 115537                |
| CD19-APCCy7                          | 6D5          | Biolegend        | 115529                |
| CD20-APC                             | SA275A11     | Biolegend        | 150411                |
| CD38-PerCp ef710                     | 90           | Thermo Fisher    | 46-0381-80            |
| CD43-BV750                           | S7           | BD Biosciences   | 747277                |
| CD43-APC                             | S11          | Biolegend        | 143207                |
| CD44-BV421                           | IM7          | BD Biosciences   | 563970                |
| CD45-FITC                            | 30-F11       | Biolegend        | 103108                |
| CD45-AF532                           | 30-F11       | Thermo Fisher    | 58-0451-82            |
| CD45-PerCp Cy5.5                     | 30-F11       | Biolegend        | 103131                |
| CD45-BUV737                          | 30-F11       | BD Biosciences   | 748371                |
| CD45.2-BUV737                        | 104          | BD Biosciences   | 612778                |
| CD62L-PECy7                          | MEL-14       | Biolegend        | 104418                |
| CD69-PE                              | H1.2F3       | Biolegend        | 104508                |
| CD73-APC                             | TY/11.8      | Biolegend        | 127209                |
| CD80-BV421                           | 16-10A1      | BD Biosciences   | 562611                |
| CD138-PE                             | 281-2        | Biolegend        | 142503                |
| IgA-Biotin                           | RMA-1        | Biolegend        | 407003                |
| IgD-PerCp ef710                      | 11-26c       | Thermo Fisher    | 46-5993-82            |
| IgD-AF488                            | 11-26c       | Biolegend        | 405717                |
| IgG1-FITC                            | RMG1-1       | Biolegend        | 406606                |
| IgG2b-FITC                           | RMG2b-1      | Biolegend        | 406705                |
| IgG2c-FITC                           | polyclonal   | Southern Biotech | 1079-02               |
| IgG3-Biotin                          | RMG3-1       | Biolegend        | 406803                |
| IgM-PECy7                            | RMM-1        | Biolegend        | 406514                |
| IgM-eF450                            | eB121-15F9   | Thermo Fisher    | 48-5890-82            |
| PD-L2-PE                             | TY25         | Biolegend        | 107205                |
| <i>Human flow cytometry</i>          |              |                  |                       |
| B220-BUV737                          | RA3-6B2      | BD Biosciences   | 564449                |
| CD4-PECy7                            | RPA-T4       | BD Biosciences   | 560649                |
| CD19-FITC                            | HIB19        | Biolegend        | 302206                |
| CD27-BV421                           | M-T271       | BD Biosciences   | 562513                |
| CD38-APCCy7                          | HB-7         | Biolegend        | 356616                |
| CD69-PE                              | FN50         | Biolegend        | 310906                |
| CD83-APC                             | HB15e        | Biolegend        | 305311                |
| IgD-PerCP Cy5.5                      | 1A6-2        | BD Biosciences   | 561315                |
| IgM-BV510                            | G20-127      | BD Biosciences   | 563113                |

**Table S1. Antibodies used in flow cytometry of mouse and human tissues**

| Multiplex fluorescent immunohistochemical optimization parameters |                   |         |                |                           |                                    |                      |
|-------------------------------------------------------------------|-------------------|---------|----------------|---------------------------|------------------------------------|----------------------|
| Sequence                                                          | Species and Clone | Antigen | Catalog Number | Primary Antibody Dilution | Fluorophore<br>(Akoya Biosciences) | Fluorophore Dilution |
| 1                                                                 | Rb D7D2Z          | CD4     | CST 25229      | 1:50                      | Opal 480-FP1500001KT               | 1:40                 |
| 2                                                                 | Rb D4V4B          | CD19    | CST 90176      | 1:600                     | Opal 620-FP1495001KT               | 1:50                 |

**Table S2. Multiplex fluorescent immunohistochemical optimization parameters**
