# Supplementary material for: Lung-resident memory B cells protect against bacterial pneumonia
Source: JCI journal article supplement (doi:10.1172/jci141810), 2021-06-01
Supplement: sd1 [file 1]

You are being redirected.
